# Supplementary material
Source: PubMed Central journal article supplement (PMC5411293)

Supplementary Figure 1

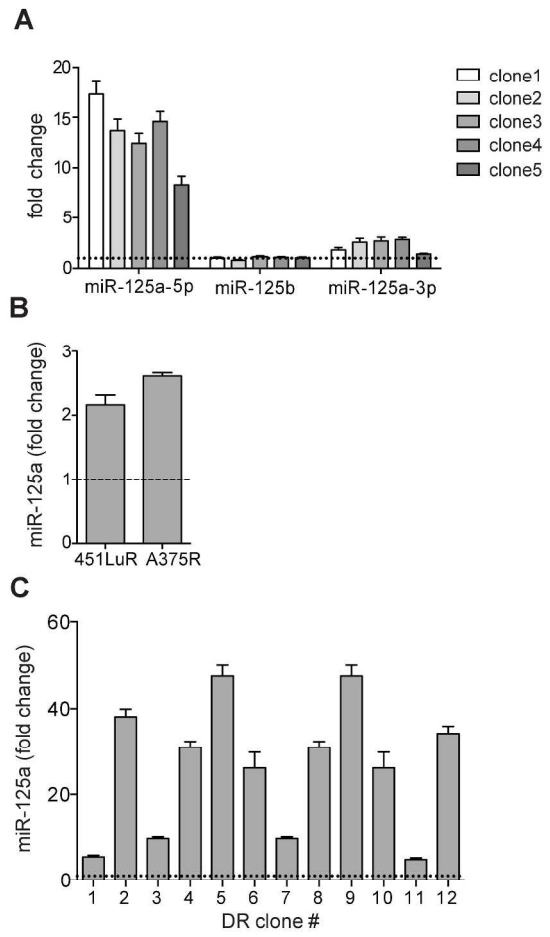

Supplementary Figure 2

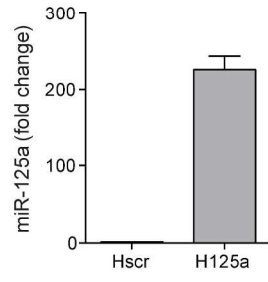

Supplementary Figure 3

**A**

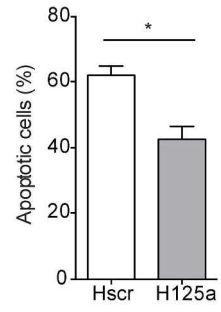

**B**

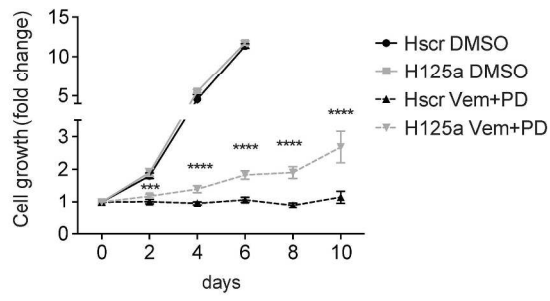

Supplementary Figure 4

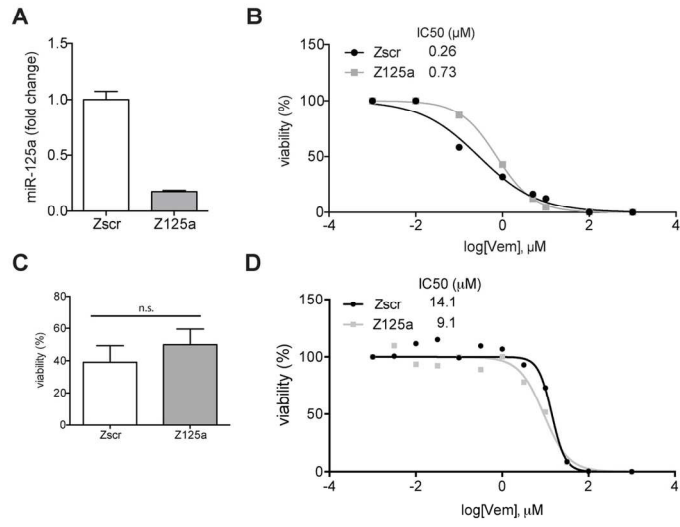



Supplementary Figure 6

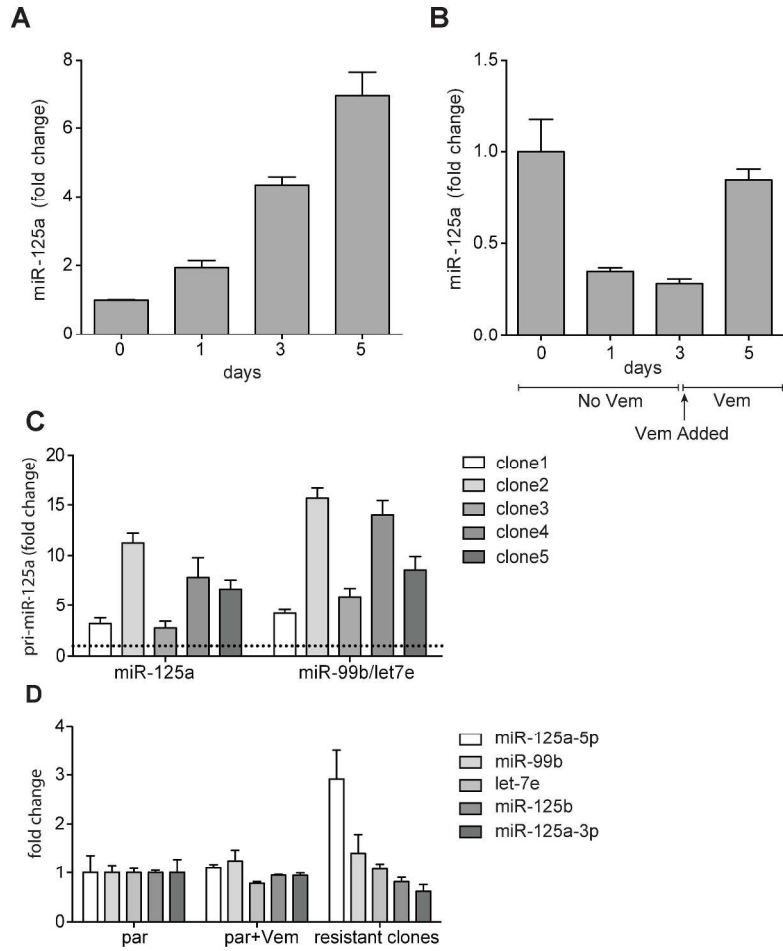

Supplementary Figure 7

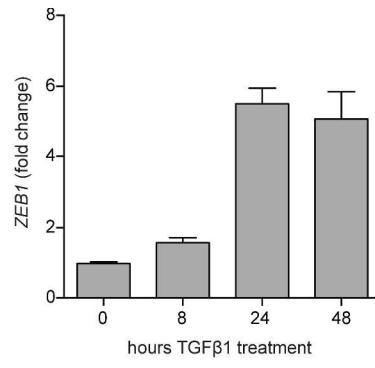

Supplement: NIHMS848054-supplement-Supp_Fig_S1-7.pdf [file NIHMS848054-supplement-Supp_Fig_S1-7.pdf]
